# Supplementary material for: Luminescent coordination nanoparticles
Source: Royal Society of Chemistry journal article supplement (doi:10.1039/b719146d), 2008-01-01
Supplement: b719146d.pdf [file b719146d.pdf]

## Luminescent Coordination Nanoparticles

Nicolas Kerbellec,<sup>†</sup> Laure Catala,<sup>‡</sup> Carole Daiguebonne,<sup>†</sup> Alexandre Gloter,<sup>§</sup> Odile Stephan,<sup>§</sup> Jean-Claude Bünzli,<sup>¶</sup> Olivier Guillou<sup>\*†</sup> and Talal Mallah<sup>\*‡</sup>

<sup>†</sup> Sciences Chimiques de Rennes – Equipe « Matériaux Inorganiques : Chimie Douce et Réactivité » UMR CNRS-INSA 6226, INSA, 20 Avenue des buttes de Coësmes – 35043 Rennes – France.

<sup>‡</sup> Institut de Chimie Moléculaire et des Matériaux d'Orsay, CNRS, Université Paris-Sud 11, 91405 Orsay Cedex, France.

<sup>§</sup> Laboratoire de Physique des Solides, UMR CNRS 8502, Université Paris-Sud 11, 91405 Orsay Cedex, France.

<sup>¶</sup> Ecole Polytechnique Fédérale de Lausanne – Laboratoire de Chimie Supramoléculaire des Lanthanides, BCH 1402, CH-1015 Lausanne, Suisse.

### Supplementary Materials

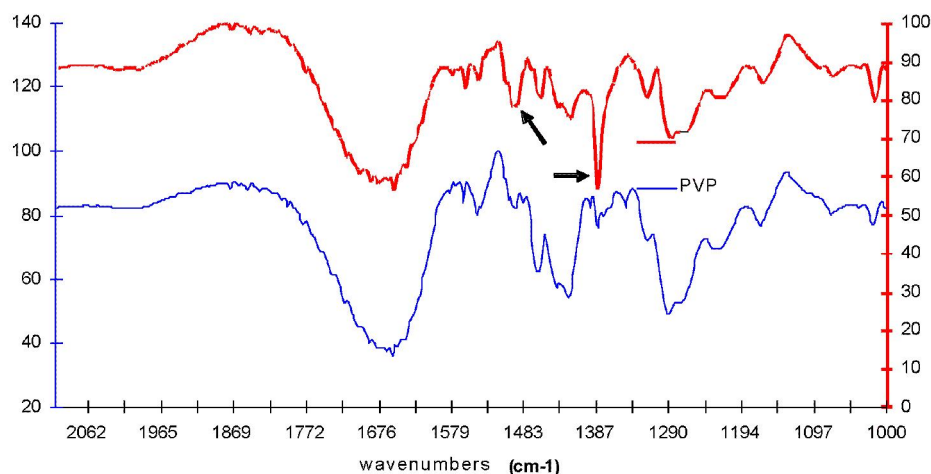

Figure S1 : Infra-red spectra of PVP (in blue) and the nanoparticles embedded in PVP (in red). The arrows indicate the vibrations corresponding to the bands characteristic of the COO<sup>-</sup> group.

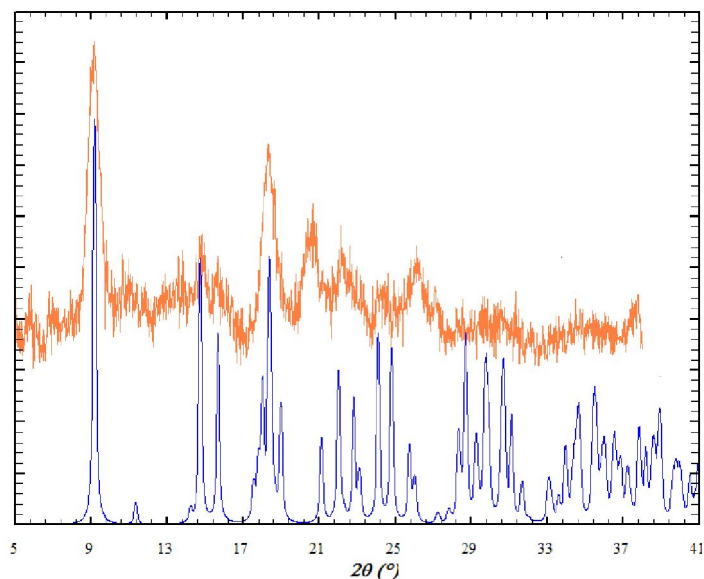

Figure S2. X-ray powder diffraction pattern of the nanoparticles (red) corrected from the PVP contribution<sup>‡</sup> and the bulk Tb<sub>2</sub>(bdc)<sub>3</sub>(H<sub>2</sub>O)<sub>4</sub> compound (blue).

<sup>‡</sup> The presence of a relatively large amount of PVP in the sample and the relatively small size of the particles (4-5 nm) preclude obtaining well defined peaks for the XRPD. The diagram is clearly not a definitive proof of the presence of the particles but is only one element among others.

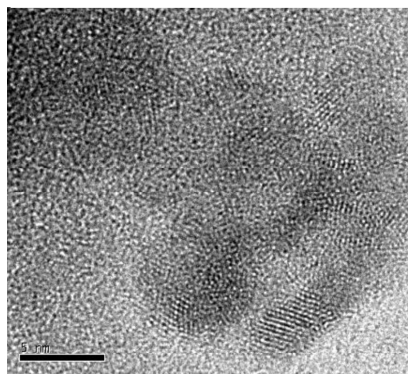

Figure S3a. High Resolution Transmission Electron micrograph of the Tb-nanoparticles at T = 77 K (scale bar 5 nm). Fringes with 2.8-3 Å spacing can be observed.

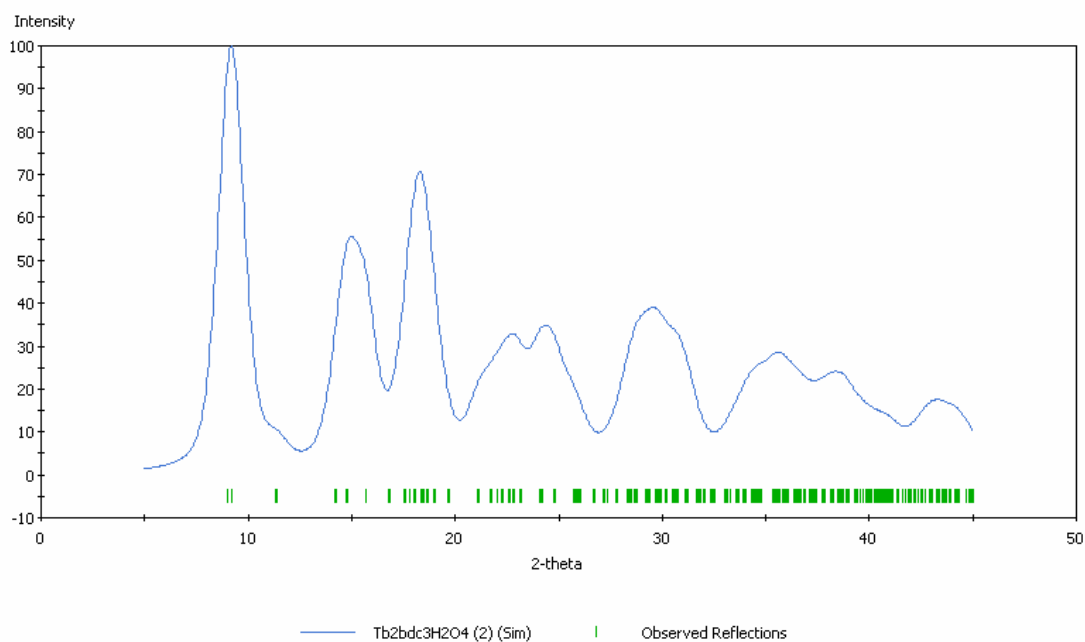

Figure S3b. Calculated X-ray diffraction diagram of a 5x5x5 nm particles. The position of the peaks is in very good agreement with the experimental spectrum in Fig. S2.

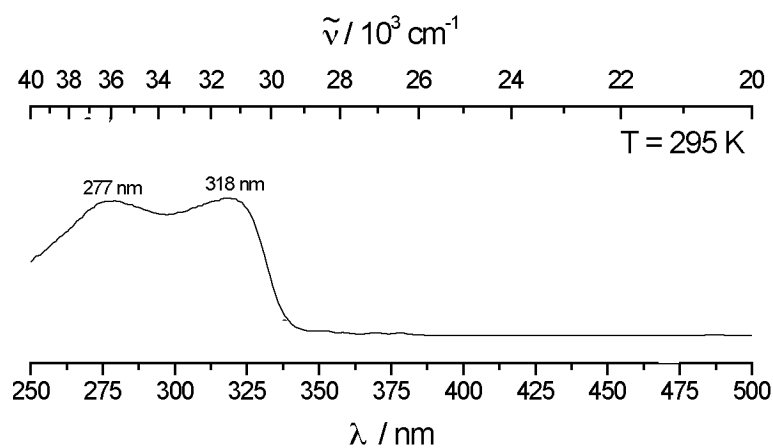

Figure S4. Excitation spectrum of the Tb-nanoparticles

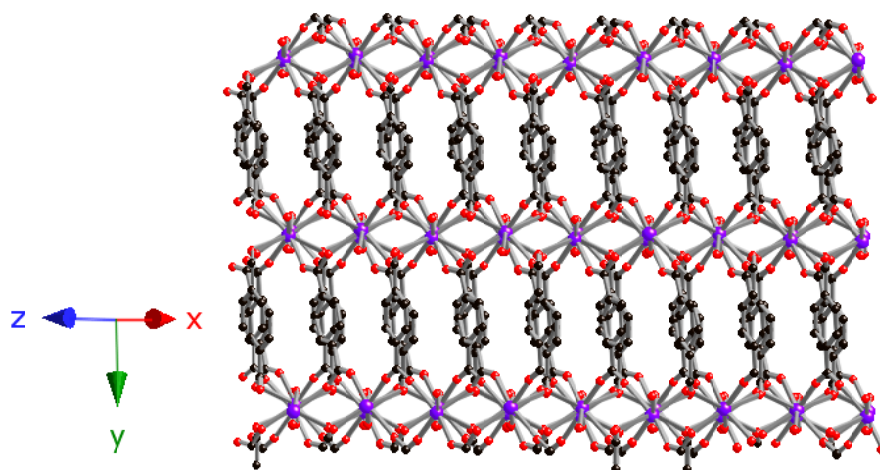

Figure S5. schematic view of the structure; the interplanar Tb-Tb distance along b is equal to 10 Å; oxygen atoms (red), Tb atoms (blue), carbon atoms (black).

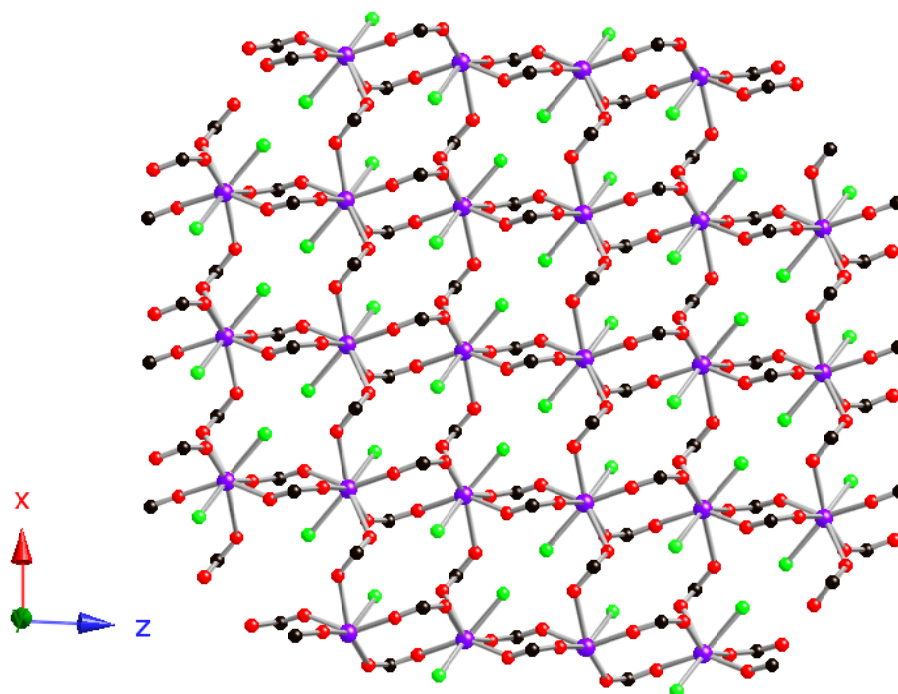

Figure S6. schematic view of the structure within the ac plane; the Tb-Tb distances along c and b are 5.1 and 6.1 Å respectively. For clarity, only part of the bdc<sup>2-</sup> ligand is shown: water oxygen atoms (green), bdc<sup>2-</sup> oxygen atoms (red), Tb atoms (blue), carbon atoms (black)

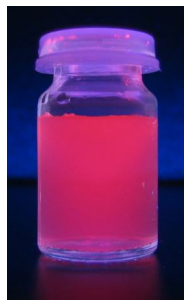

Figure S7.  $\text{Eu}_2(\text{bdc})_3(\text{H}_2\text{O})_4$  nanoparticles in PVP re-dispersed in water after irradiation at  $\lambda = 312$  nm.

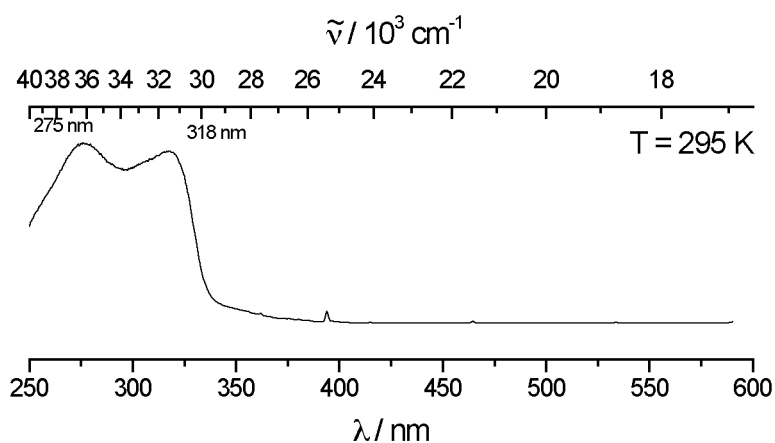

Figure S8. Excitation spectrum of the Eu-nanoparticles

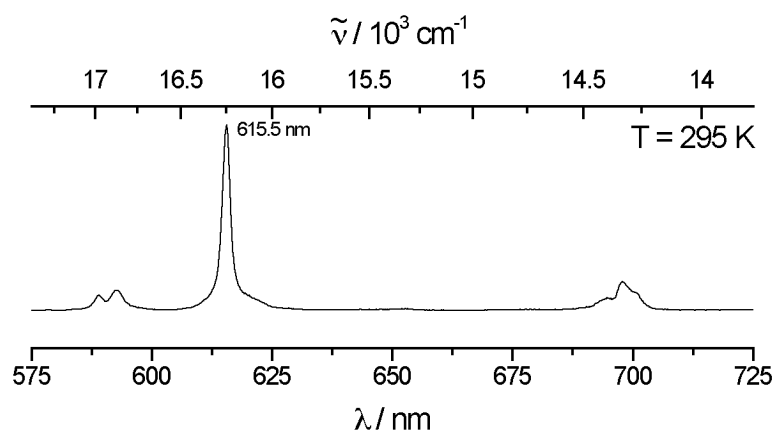

Figure S9. Emission spectrum of the Eu-nanoparticles
